# Supplementary material
Source: ML conference proceedings conference paper supplement (https://openaccess.thecvf.com/content/cvpr_2015/html/Ramanathan_Learning_Semantic_Relationships_2015_CVPR_paper.html)
Supplement: Supplementary file 1 [file Ramanathan_Learning_Semantic_Relationships_2015_CVPR_supplemental.pdf]

# Learning semantic relationships for better action retrieval in images (Supplementary)

Vignesh Ramanathan\*, Congcong Li<sup>†</sup>, Jia Deng<sup>+</sup>, Wei Han<sup>†</sup>,  
Zhen Li<sup>†</sup>, Kunlong Gu<sup>†</sup>, Yang Song<sup>†</sup>, Samy Bengio<sup>†</sup>, Chuck Rosenberg<sup>†</sup> and Li Fei-Fei\*

\*Stanford University, <sup>†</sup>Google, <sup>+</sup>University of Michigan

vigneshr@cs.stanford.edu, congcongli@google.com, jiadeng@umich.edu

{weihan, zhenli, kunlonggu, yangsong, bengio, chuck}@google.com, feifeili@cs.stanford.edu

## 1. Experiment on Stanford 40 actions [5]

The original Stanford 40 actions dataset [5] has a carefully chosen set of 40 actions which are mutually exclusive of each other. This makes the dataset less applicable for large scale settings such as ours. Nevertheless, in order to demonstrate results on this dataset, we extend it with 41 additional action labels as explained below.

**Setup** We introduce 41 new action labels to this dataset. The additional actions are chosen such that they are *implied-by* one or more of the original 40 actions. The newly added labels are shown in Tab. 2. Against each of the original 40 actions, we show the set of newly added actions which are implied by this original action. We follow the experimental protocol from Deng et al. [2] and “relabel” a subset of the images to the newly added actions. More precisely, we relabel 50% of the images belonging to an original action to one of the newly introduced actions which is *implied-by* this original action (as shown in Tab. 2). For instance, some images belonging to “playing violin” are now relabelled to “playing an instrument”. We do this for both the training and testing images. Note that we do not add any new images to the dataset, and each image still has exactly only one label. Hence, the original set of 4000 training images are now redistributed into 81 classes.

**Evaluation** We use mean average precision to evaluate our method as before. Since the newly added actions are related to each other, the positive image of an action could also be a positive for other actions. Hence, for every action we only treat the images of other actions which are mutually exclusive or unrelated as negative examples.

**Experiment** We use the same deep neural network architecture as before. We initialize the relation prediction tensor layer as well as the image embedding layer with the corresponding layers learned from the 27K action dataset. We use the same hyper parameters as before.

**Results** We show results on our extended version of the

| Method             | mAP (%) 81 ac. | mAP (%) 41 new ac. |
|--------------------|----------------|--------------------|
| LOGISTIC           | 21.85          | 18.23              |
| SOFTMAX            | 36.14          | 33.19              |
| LANGRELWITHHEX [2] | 36.48          | 32.77              |
| RANKLOSS           | 36.38          | 31.72              |
| DEVISE [3]         | 34.11          | 30.13              |
| OURONLYLANGREL     | 37.12          | 34.23              |
| OURFULLMODEL       | <b>38.91</b>   | <b>37.22</b>       |

Table 1. Results of action retrieval on the extended version of the Stanford 40 actions dataset. The first column shows results for all the 81 actions, while the second column shows results for only the 41 newly added actions.

Stanford 40 actions dataset in Tab. 1. Additionally, we also separately list the results for the newly added action labels. The baselines are the same as explained in the main draft.

Our full model outperforms all baseline models on the 81 actions. The performance improvement is more pronounced for the newly added action labels shown in the second column. The added actions are implied-by the original actions, and identifying these implied-by relationship would lead to better performance gain as explained in the main draft. As expected, the improvement in mean AP for these newly added actions is seen to be larger than that for the original 40 actions.

## 2. Language based rules for action relations

We discuss the simple set of rules which are used to determine the relationship between a pair of actions whenever possible. These rules are based on WordNet relationship between entities. The actions in our dataset are of one of the following forms:

- *SVD* ⟨subject, verb, direct-object⟩. eg: Person eating food
- *SVP* ⟨subject, verb, prepositional-object⟩. eg: Person eating with fork

| Original action              | Newly added <i>implied-by</i> actions                                       |
|------------------------------|-----------------------------------------------------------------------------|
| applauding                   | clapping , cheering others                                                  |
| blowing bubbles              | blowing something , holding a container , releasing something               |
| brushing teeth               | holding a toothbrush , doing an oral activity                               |
| cleaning the floor           | cleaning something , holding a cleaning device , working on the floor       |
| climbing                     | clinging to something , doing hard physical activity , playing some sport   |
| cooking                      | preparing food , handling food                                              |
| cutting trees                | cutting something , holding a cutting tool                                  |
| cutting vegetables           | preparing food , handling food , cutting something , holding a cutting tool |
| drinking                     | holding a container                                                         |
| feeding a horse              | handling food , interacting with an animal                                  |
| fishing                      | doing something near water , holding something                              |
| fixing a bike                | fixing something , working with a bike , working with a vehicle             |
| fixing a car                 | fixing something , working with a vehicle , working with a car              |
| gardening                    | working on the ground , tending to a garden , doing an outdoor activity     |
| holding an umbrella          | holding something                                                           |
| jumping                      | –                                                                           |
| looking through a microscope | looking through something , bending over something                          |
| looking through a telescope  | looking through something                                                   |
| playing guitar               | playing an instrument                                                       |
| playing violin               | playing an instrument                                                       |
| pouring liquid               | holding a container                                                         |
| pushing a cart               | doing hard physical activity , pushing something                            |
| reading                      | looking at something , looking at a book                                    |
| phoning                      | interacting with the phone , holding something                              |
| riding a bike                | working with a bike , working with a vehicle                                |
| riding a horse               | interacting with a horse , interacting with an animal                       |
| rowing a boat                | doing hard physical activity , doing something near water                   |
| running                      | doing hard physical activity , playing some sport                           |
| shooting an arrow            | playing some sport , releasing something                                    |
| smoking                      | holding something , blowing something , doing an oral activity              |
| taking photos                | holding something , looking into something                                  |
| texting message              | interacting with the phone , holding something , typing on something        |
| throwing frisby              | releasing something , playing some sport                                    |
| using a computer             | looking at a screen , typing on something                                   |
| walking the dog              | moving                                                                      |
| washing dishes               | cleaning something                                                          |
| watching TV                  | looking at a screen                                                         |
| waving hands                 | –                                                                           |
| writing on a board           | writing on something , holding something                                    |
| writing on a book            | writing on something , holding something                                    |

Table 2. The original 40 actions of the Stanford dataset [5] are shown in the first column. The newly added action labels are shown in the second column. Again each original action, we show the subset of newly added actions which are *implied by* this original action. For the experiments, 50% of the images belonging to an original action is relabelled to one of its *implied by* actions shown in the second column.

- *SVDP*(subject, verb, direct-object, prepositional-object ). eg: Person eating food with fork.

Given these forms, we use the following rules for determining relationship between actions  $A_1$  and  $A_2$ , where the earlier rules take precedence over the later rules in case of conflict. These rules are a direct consequence of the relationships defined in WordNet, and is similar to the hierarchy based structure used in other works such as [4].

1.  $A_1$  **is implied-by**  $A_2$ , if  $A_1$  has *SVD* form,  $A_2$  has *SVD* or *SVDP* form and all the three words of  $A_1$  are either synonyms, meronyms, hyponyms of the corresponding words in  $A_2$ . eg: “Person cleaning building” is *implied-by* “Woman washing window”
2.  $A_1$  **is implied-by**  $A_2$ , if  $A_1$  has *SVP* form,  $A_2$  has *SVP* or *SVDP* form and all the three words of  $A_1$  are either synonyms, meronyms, hyponyms of the corresponding

words in  $A_2$ . eg: “Person drinking from container” is *implied-by* “Person drinking water from bowl”

3.  $A_1$  is *type-of*  $A_2$ , if  $A_1$  has *SVD* or *SVDP* form,  $A_2$  has *SVD* form and the subject, verb, direct-object of  $A_1$  are either synonyms, holonyms, hypernyms of the corresponding words in  $A_2$ . eg: “Chef baking pizza in oven” is *type-of* “Person cooking food”
4.  $A_1$  is *type-of*  $A_2$ , if  $A_1$  has *SVP* or *SVDP* form,  $A_2$  has *SVP* form and the subject, verb, prepositional-object of  $A_1$  are either synonyms, holonyms, hypernyms of the corresponding words in  $A_2$ . eg: “Teacher writing on board with chalk” is *type-of* “Person writing with something”
5.  $A_1$  is *mutually exclusive of*  $A_2$ , if  $A_1$  has *SVD* form,  $A_2$  has *SVD* or *SVDP* form, exactly two words of  $A_1$  are either synonyms, hyponyms, hypernyms of the corresponding words in  $A_2$ , and the third word of  $A_1$  shares a common hypernym with the corresponding word of  $A_2$ . eg.: “Perosn riding horse” is *mutually exclusive of* “Woman riding camel with a hat”
6.  $A_1$  is *mutually exclusive of*  $A_2$ , if  $A_1$  has *SVP* form,  $A_2$  has *SVP* or *SVDP* form, exactly two words of  $A_1$  are either synonyms, hyponyms, hypernyms of the corresponding words in  $A_2$ , and the third word of  $A_1$  shares a common hypernym with the corresponding word of  $A_2$ . eg.: “Woman eating on table” is *mutually exclusive of* “Person eating food on floor”
7.  $A_1$  is *mutually exclusive of*  $A_2$ , if  $A_2$  is mutually exclusive of  $A_1$ .

### 3. Disallowed states for consistency loss

As explained in the main draft, certain sets of relationships between a triplet of actions are deemed to be inconsistent with each other. We penalized these relationships in the consistency loss. We list these inconsistent relationships in Tab. 3. For instance, the first row provides the following inconsistent relationship: action  $A_1$  is *implied-by*  $A_2$ ,  $A_1$  is *type-of*  $A_3$  and  $A_2$  is *mutually exclusive of*  $A_3$ .

### 4. Implementation details

The full objective is minimized through downpour stochastic gradient descent [1]. The various hyperparameters of the model:  $\{\beta, \lambda, \alpha_r, \alpha_c, \alpha_n\}$ , were obtained through grid search to maximize performance on a validation set. These parameters were set to 1000, 0.01, 5, 0.1, 10 respectively for both experimental settings in the next section. The embedding dimension  $n$  was set to 64. While training the model, we run the first few iterations without

| $A_1-A_2$ | $A_1-A_3$ | $A_2-A_3$ |
|-----------|-----------|-----------|
| i         | t         | m         |
| i         | t         | i         |
| t         | i         | m         |
| t         | i         | i         |
| t         | t         | m         |
| i         | m         | i         |
| i         | m         | t         |
| m         | i         | i         |
| m         | i         | t         |
| t         | m         | t         |
| m         | t         | i         |

Table 3. The set of inconsistent relationships are shown for a triple of actions  $A_1, A_2, A_3$ . The first column denotes the relationship of  $A_1$  with respect to  $A_2$ , the second column denotes the relationship of  $A_1$  with respect to  $A_3$  and the third column denotes the relationship of  $A_2$  with respect to  $A_3$ . Here, “p” denotes *implied-by*, “t” denotes *type-of* and “m” denotes *mutually exclusive* relationships.

the relation prediction objectives. We provide more details in the supplementary material.

We also observed a performance gain by fixing the relation predictions and only optimizing the action prediction objective in the final few iterations.

We use a batch size of 8 actions for the action recognition model, where each action is accompanied by 1 positive and 7 negative images, leading to a total of 128 images per batch. Similarly, we use a batch size of 10 action pairs for the relationship prediction models, where each action pair is accompanied by 12 images, corresponding to 4 positive images of each action and 4 negative images. We initialize the learning rate at 0.1 and gradually decrease it during training based on a visual inspection of the cost curve.

### References

- [1] J. Dean, G. Corrado, R. Monga, K. Chen, M. Devin, M. Mao, A. Senior, P. Tucker, K. Yang, Q. V. Le, et al. Large scale distributed deep networks. In *Advances in Neural Information Processing Systems*, pages 1223–1231, 2012.
- [2] J. Deng, N. Ding, Y. Jia, A. Frome, K. Murphy, S. Bengio, Y. Li, H. Neven, and H. Adam. Large-scale object classification using label relation graphs. In *Computer Vision–ECCV 2014*, pages 48–64. Springer, 2014.
- [3] A. Frome, G. S. Corrado, J. Shlens, S. Bengio, J. Dean, T. Mikolov, et al. Devise: A deep visual-semantic embedding model. In *Advances in Neural Information Processing Systems*, pages 2121–2129, 2013.
- [4] S. Guadarrama, N. Krishnamoorthy, G. Malkarnenkar, S. Venugopalan, R. Mooney, T. Darrell, and K. Saenko. Youtube2text: Recognizing and describing arbitrary activities using semantic hierarchies and zero-shot recognition. In *Computer Vision (ICCV), 2013 IEEE International Conference on*, pages 2712–2719. IEEE, 2013.
- [5] B. Yao, X. Jiang, A. Khosla, A. L. Lin, L. Guibas, and L. Fei-Fei. Human action recognition by learning bases of action

attributes and parts. In *Computer Vision (ICCV), 2011 IEEE International Conference on*, pages 1331–1338. IEEE, 2011.
